# Supplementary material
Source: Springer Nature journal article supplement (https://www.springermedizin.de/resource/supplementary/12943_2009_534_MOESM5_ESM.pdf/9554622)

control

nelfinavir

staurosporine

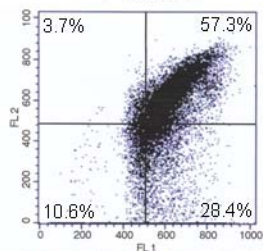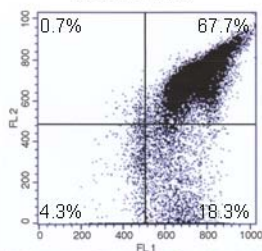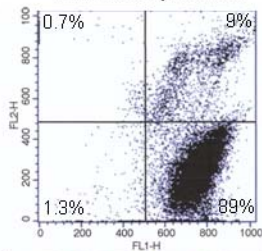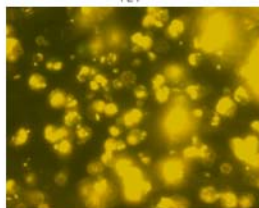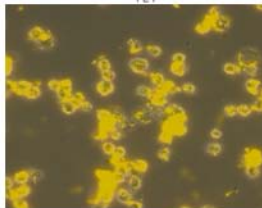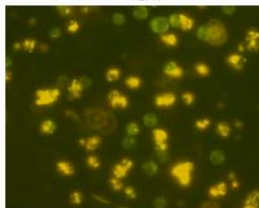

yellow-red  
fluorescence

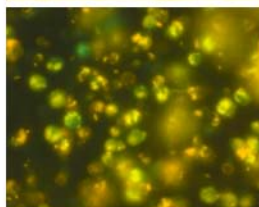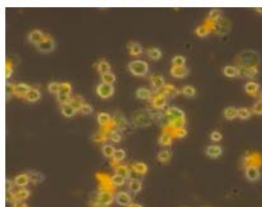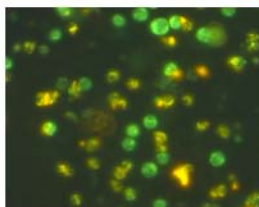

green  
fluorescence

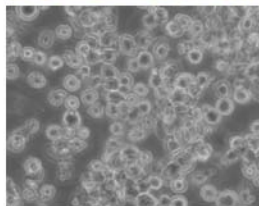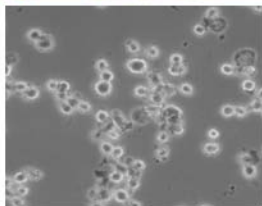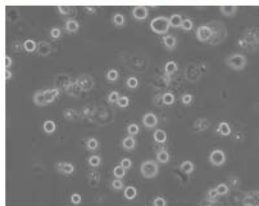

phase

Supplement: MOESM5 [file 9554622]
